# Supplementary material
Source: ML conference proceedings conference paper supplement (https://proceedings.neurips.cc/paper_files/paper/2025/hash/7d221cd24da6832273b22b73e3276bb0-Abstract.html)
Supplement: Supplementary file 1 [file 7d221cd24da6832273b22b73e3276bb0-Supplemental-Datasets_and_Benchmarks_Track.pdf]

---

# Appendix for "CaMiT: A Time-Aware Car Model Dataset for Classification and Generation"

---

Frédéric Lin      Biruk Abere Ambaw      Adrian Popescu      Hejer Ammar  
Romaric Audigier      Hervé Le Borgne

Université Paris-Saclay, CEA, List, F-91120, Palaiseau, France  
{firstname.lastname}@cea.fr

|    |                                                                  |           |
|----|------------------------------------------------------------------|-----------|
| 1  | <b>Appendix Contents</b>                                         |           |
| 2  | <b>A Dataset creation</b>                                        | <b>2</b>  |
| 3  | A.1 A1: Data collection . . . . .                                | 2         |
| 4  | A.1.1 Google Images . . . . .                                    | 2         |
| 5  | A.1.2 TIC-DataComp . . . . .                                     | 2         |
| 6  | A.1.3 Flickr . . . . .                                           | 3         |
| 7  | A.2 Data Filtering . . . . .                                     | 5         |
| 8  | A.3 Data Annotation . . . . .                                    | 6         |
| 9  | <b>B Evaluation metrics</b>                                      | <b>10</b> |
| 10 | <b>C Static Pretraining</b>                                      | <b>11</b> |
| 11 | C.1 Static Model Training Procedure . . . . .                    | 11        |
| 12 | C.2 Additional static pretraining results . . . . .              | 12        |
| 13 | <b>D Time-incremental pretraining</b>                            | <b>14</b> |
| 14 | D.1 TIP Model Training Procedure . . . . .                       | 14        |
| 15 | D.2 Additional TIP Results . . . . .                             | 15        |
| 16 | <b>E Time-incremental classifier learning</b>                    | <b>18</b> |
| 17 | E.1 TICL Methods: Training Procedure . . . . .                   | 18        |
| 18 | E.2 Additional TICL Results . . . . .                            | 19        |
| 19 | <b>F Time-aware image generation</b>                             | <b>24</b> |
| 20 | F.1 Generative model fine-tuning procedure . . . . .             | 24        |
| 21 | F.2 Visualizing Temporal Dynamics in Generated Samples . . . . . | 24        |
| 22 | <b>G Experiment Costs</b>                                        | <b>27</b> |
| 23 | G.1 GPU Hours . . . . .                                          | 27        |
| 24 | G.2 Monetary Cost . . . . .                                      | 27        |

## 25 **A Dataset creation**

### 26 **A.1 A1: Data collection**

#### 27 **A.1.1 Google Images**

28 We initially experimented with Google Images as a data source, leveraging its extensive web index  
29 and the ability to filter results by date using Google Custom Search Engine (CSE) APIs [8]. Our  
30 goal was to assess whether Google could provide reliable, fine-grained car model images with usable  
31 temporal metadata.

32 We implemented a search script using the `googleapiclient` package [7] provided by the Google  
33 Custom Search service. For each car model (e.g., “Renault Twingo”), we divided each year  
34 into 5 time intervals (roughly bimonthly) and queried with a temporal constraint in the form  
35 `before:{end_date} after:{start_date}`.

36 To assess the reliability of the temporal metadata associated with Google Image results, we imple-  
37 mented a verification pipeline using the `contextLink` field returned by the Google Custom Search  
38 API. For each image, we extracted the URL of the host page and attempted to retrieve an explicit  
39 publication date using multiple strategies.

40 We parsed each web page using `BeautifulSoup` [22], looking for common metadata fields such as:

- 41 • `<meta name="date">`, `<meta property="article:published_time">`, `<meta`  
42 `itemprop="datePublished">`
- 43 • JSON-LD blocks with `"datePublished"` keys
- 44 • `<time>` or `<span class="date">` tags with `datetime`

45 If structured metadata is unavailable, we applied pattern-matching heuristics using regular expressions  
46 to extract date-like substrings from the page content and URL itself.

47 We performed this analysis using a representative query: “Renault Twingo”. After collecting and  
48 validating publication dates from the image context links for this model, we compared them to the  
49 intended query year. For each image, we computed the difference between the target year and the  
50 actual year extracted from metadata.

51 We then conducted two statistical tests to assess whether this difference was significantly different  
52 from zero: (1) a one-sample t-test and (2) a Wilcoxon signed-rank test [26]. Both tests revealed  
53 strong evidence of temporal mismatch. The t-test returned  $p = 1.58 \times 10^{-47}$ , and the Wilcoxon  
54 test returned  $p = 5.41 \times 10^{-70}$ . These results indicate that the actual publication years significantly  
55 differ from the intended targets.

56 We also found that 49.55% of images retrieved for “Renault Twingo” lacked any reliably extractable  
57 publication date, either due to absent metadata or ambiguous timestamps. Figure 1 shows the  
58 distribution of year differences for the subset with valid timestamps. The histogram confirms a  
59 substantial deviation from the target year, with many images appearing earlier or later than intended.

60 While these results are limited to a single model, they highlight the unreliability of temporal filtering  
61 in the Google Custom Search API and motivated our decision to switch to a more structured and  
62 timestamp-consistent source.

#### 63 **A.1.2 TIC-DataComp**

64 We also considered TIC-DataComp [6], the time-aware version of DataComp [5], as a potential  
65 resource for collecting car model images. DataComp includes metadata for 12.8 billion images  
66 uploaded to the Web between 2014 and 2023. We matched car model names against the metadata and  
67 retrieved over 90 million potentially relevant samples, averaging 475K samples per car model with a  
68 standard deviation of 503K.

69 However, the temporal distribution of images in TIC-DataComp is highly imbalanced (see Figure 2),  
70 with the majority of samples concentrated between 2017 and 2022. For instance, the dataset contains  
71 only 256M images for 2014 and just 193K for 2023, compared to over 2 billion for years like 2019  
72 and 2021. This severe imbalance, combined with the relatively narrow coverage (10 years), limits its

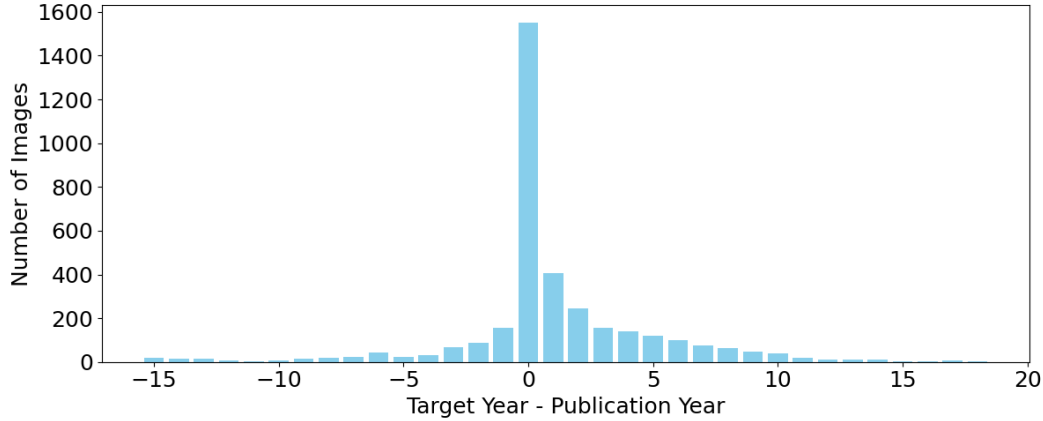

Figure 1: Histogram of differences between the target query year and the extracted publication year for “Renault Twingo” images with valid metadata.

73 usefulness for studying temporal dynamics in car model imagery. In contrast, our labeled dataset  
 74 spans 17 years (19 years for the unlabeled dataset), enabling a broader and more consistent temporal  
 75 analysis.

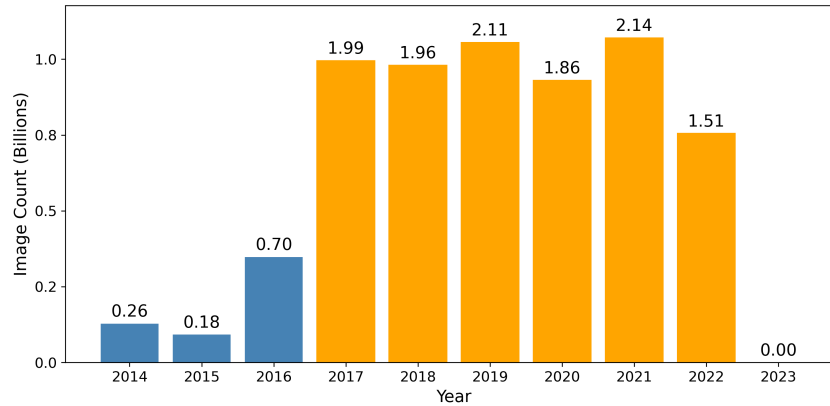

Figure 2: Yearly distribution of images in TIC-DataComp. Most data is concentrated between 2017 and 2022, with earlier and later years significantly underrepresented.

76 **A.1.3 Flickr**

77 Flickr is a multimedia content sharing platform that has been active since 2004. It has been extensively  
 78 used to curate visual datasets [4, 11, 13, 14, 19, 24, 27]. Flickr provides access to its public photos  
 79 via an API, combining text and different types of metadata, including temporal ones. We queried  
 80 the API using the `flickr.photos.search` method with the car-related classes as `text`, temporal  
 81 intervals delimited with `min_taken_date` and `max_taken_date`, and the `relevance` filter to sort  
 82 the results. We collected the following metadata: `id`, `owner`, `title`, `tags`, `date_taken`,  
 83 `date_upload`, `license`, and `url_z`. After id-based deduplication, we proceeded to collect up  
 84 to 5000 images per query-year combination. Our objective was to obtain a large domain coverage,  
 85 and we built 425 unique queries using Wikipedia, ImageNet, and by prompting ChatGPT. The list  
 86 comprises car subtypes, brands, and models. A few examples of subtypes include: `hatchback`,  
 87 `limousine`, `pickup`, `sedan`, `subcompact`, `supercar`, and `SUV`. Examples of brands include:  
 88 `Toyota`, `Volkswagen`, `Daihatsu`, `Buick`, `Bugatti`, `Dacia`, and `Xpeng`. We list the 190 car  
 89 models included in the labeled CaMiT subset in Table 1.

Table 1: List of car models in CaMiT grouped by brand.

| Brand         | Models                                                                                                                                                                                      |
|---------------|---------------------------------------------------------------------------------------------------------------------------------------------------------------------------------------------|
| Acura         | acura mdx, acura tlx                                                                                                                                                                        |
| Alfa Romeo    | alfa romeo giulietta, alfa romeo mito                                                                                                                                                       |
| Aston Martin  | aston martin db9, aston martin dbs, aston martin rapide, aston martin vantage                                                                                                               |
| Audi          | audi a3, audi a4, audi a5, audi a6, audi a8, audi q3, audi q5, audi q7, audi r8, audi tt                                                                                                    |
| Bentley       | bentley bentayga, bentley continental                                                                                                                                                       |
| Bmw           | bmw 1 series, bmw 3 series, bmw 5 series, bmw 7 series, bmw x1, bmw x3, bmw x5, bmw x6, bmw z4                                                                                              |
| Bugatti       | bugatti chiron, bugatti veyron                                                                                                                                                              |
| Cadillac      | cadillac cts, cadillac escalade                                                                                                                                                             |
| Chevrolet     | chevrolet camaro, chevrolet corvette, chevrolet impala, chevrolet suburban                                                                                                                  |
| Chrysler      | chrysler 300                                                                                                                                                                                |
| Citroën       | citroen 2cv, citroen c3, citroen c4                                                                                                                                                         |
| Dodge         | dodge challenger, dodge charger, dodge durango, dodge viper                                                                                                                                 |
| Ferrari       | ferrari 458 italia, ferrari 599, ferrari f40, ferrari f430                                                                                                                                  |
| Fiat          | fiat 500, fiat panda, fiat punto                                                                                                                                                            |
| Ford          | ford bronco, ford crown victoria, ford ecosport, ford edge, ford escape, ford explorer, ford fiesta, ford focus, ford fseries, ford gt, ford mondeo, ford mustang, ford ranger, ford taurus |
| Honda         | honda accord, honda civic, honda crv, honda fit, honda integra, honda nsx, honda odyssey, honda s2000                                                                                       |
| Hyundai       | hyundai accent, hyundai elantra, hyundai genesis coupe, hyundai santa fe, hyundai sonata, hyundai veloster                                                                                  |
| Infiniti      | infiniti g                                                                                                                                                                                  |
| Isuzu         | isuzu dmax                                                                                                                                                                                  |
| Jaguar        | jaguar etype                                                                                                                                                                                |
| Jeep          | jeep cherokee, jeep grand cherokee, jeep wrangler                                                                                                                                           |
| Kia           | kia optima, kia rio, kia sorento, kia soul, kia sportage, kia stinger                                                                                                                       |
| Lamborghini   | lamborghini aventador, lamborghini gallardo, lamborghini huracan, lamborghini murcielago                                                                                                    |
| Lancia        | lancia delta                                                                                                                                                                                |
| Land          | land rover defender, land rover discovery, land rover range rover                                                                                                                           |
| Lexus         | lexus gs, lexus is, lexus rx                                                                                                                                                                |
| Lincoln       | lincoln continental                                                                                                                                                                         |
| Maserati      | maserati granturismo, maserati quattroporte                                                                                                                                                 |
| Mazda         | mazda cx5, mazda mazda3, mazda mazda6, mazda mx5, mazda rx7                                                                                                                                 |
| Mercedes-Benz | mercedes-benz cclass, mercede-sbenz cla, mercedes-benz cls class, mercedes-benz eclass, mercedes-benz gclass, mercedes-benz sclass, mercedes-benz slr mclaren                               |
| Mini          | mini countryman, mini cooper                                                                                                                                                                |
| Mitsubishi    | mitsubishi eclipse, mitsubishi lancer evolution, mitsubishi outlander, mitsubishi pajero                                                                                                    |
| Nissan        | nissan 350z, nissan 370z, nissan altima, nissan gtr, nissan maxima, nissan pathfinder, nissan qashqai, nissan skyline gtr                                                                   |
| Opel          | opel astra, opel corsa, opel insignia, opel zafira                                                                                                                                          |
| Pagani        | pagani huayra, pagani zonda                                                                                                                                                                 |
| Peugeot       | peugeot 207, peugeot 208                                                                                                                                                                    |
| Porsche       | porsche 356, porsche 911, porsche cayenne, porsche cayman, porsche macan, porsche panamera                                                                                                  |
| Renault       | renault clio, renault kangoo, renault megane, renault scenic                                                                                                                                |
| Rolls-Royce   | rolls-royce phantom                                                                                                                                                                         |
| Seat          | seat ibiza, seat leon                                                                                                                                                                       |
| Skoda         | skoda fabia, skoda octavia, skoda superb                                                                                                                                                    |
| Smart         | smart fortwo                                                                                                                                                                                |
| Subaru        | subaru brz, subaru forester, subaru impreza, subaru legacy, subaru outback                                                                                                                  |
| Suzuki        | suzuki swift                                                                                                                                                                                |
| Tesla         | tesla model s, tesla roadster                                                                                                                                                               |
| Toyota        | toyota 4runner, toyota camry, toyota land cruiser, toyota prius, toyota rav4, toyota sienna, toyota supra, toyota tacoma, toyota tundra, toyota yaris                                       |
| Volkswagen    | volkswagen beetle, volkswagen golf, volkswagen passat, volkswagen polo, volkswagen scirocco, volkswagen tiguan, volkswagen touareg, volkswagen transporter                                  |
| Volvo         | volvo s40, volvo s60, volvo s80, volvo v40, volvo v60, volvo xc60, volvo xc90                                                                                                               |

## 90 A.2 Data Filtering

91 Our filtering pipeline removes duplicate, irrelevant, and low-quality images to prepare a dataset  
92 suitable for fine-grained car model recognition. This section expands upon the overview presented  
93 in the main text (Section 3.2), providing a detailed account of each step in the filtering process. We  
94 began with 7.5M images collected via the Flickr API. They were processed through multiple stages  
95 of filtering, as summarized in Table 2.

96 First, we removed duplicate images based on the Euclidean distance between image embeddings  
97 extracted from a pretrained CLIP model [20], using a threshold of 0.9. Next, we applied the  
98 YOLOv11x model [12], pretrained on the COCO dataset [14], to detect car instances. Only images  
99 containing at least one valid car detection were retained, resulting in 4.9M unique images and a total  
100 of 13.22M car bounding boxes. To ensure detection quality, we applied a confidence threshold of 0.6  
101 and discarded bounding boxes with width or height below 64 pixels, reducing the dataset to 6.97M  
102 bounding boxes.

103 Next, we addressed the semantic quality of the detections. While YOLO provided spatial bounding  
104 boxes for cars, some detections corresponded to irrelevant content such as vehicle interiors, close-up  
105 parts, toy models, or artificial renderings. To filter these cases, we used the Qwen2.5-7B vision-  
106 language model [2], guided by the following structured prompt:

```
107     Please analyze the image and answer the following three
108     questions:
109     1. Does the image only show the interior of the car with
110     little to no exterior visible?
111     - Answer with true if it is an interior view, otherwise false.
112     2. Is the image too zoomed-in, showing only a small portion
113     of the car, making it difficult to recognize its model?
114     - If the image only contains a tiny part of the car (e.g.,
115     just a wheel, headlight, or badge) and makes model recognition
116     difficult, answer true.
117     - If the car is not fully visible but still recognizable,
118     answer false.
119     3. Does the image show a toy car, scale model, or artificial
120     rendering rather than a real vehicle?
121     - Answer true if the car is a miniature or synthetic
122     representation; otherwise, false.
123     Return your answers in the following JSON format:
124     {"interior": <true/false>, "zoomed_in": <true/false>, "toy":
125     <true/false>}
```

126 We discarded any image for which at least one of the three fields was marked as true. This step  
127 allowed automatically removing interior views, extreme close-ups, and non-realistic content. After  
128 this semantic filtering stage, 6.37M car bounding boxes remained.

129 We applied face detection and blurring following the method described in DataComp. While this did  
130 not alter dataset size, it ensured adherence to privacy standards.

131 As a final step, we introduced a directional occlusion filtering mechanism to reduce annotation  
132 ambiguity caused by overlapping car detections. This step targets car detections where one car  
133 significantly occludes another, which may hinder accurate labeling. To quantify occlusion, we defined  
134 a containment ratio  $C$  between a given bounding box  $b_1$  and any other car segmentation mask  $m_2$   
135 (generated using Segment Anything 2 [21]) within the same image:

$$C = \frac{|m_2 \cap b_1|}{|b_1|} \quad (1)$$

136 where  $|\cdot|$  denotes the area in pixels.

137 Equation 1 captures the extent to which  $b_1$  is obscured by  $m_2$ , offering a directional alternative to  
138 standard IoU. Unlike IoU, it explicitly models asymmetric occlusion—particularly useful in crowded  
139 scenes where smaller or background cars may be partially hidden by larger foreground vehicles.

140 To calibrate a suitable threshold for filtering, we manually annotated 600 image crops sampled evenly  
 141 across six containment bins (0.0 to 0.5+, 100 samples per bin). Each crop was labeled as either  
 142 “highly occluded” or “not occluded.” Figure 3 summarizes the number of high-occlusion cases per  
 143 bin. Based on this analysis, we selected a threshold of 0.2: occlusion cases become significantly  
 144 more frequent above this value (e.g., 28 or more per bin), while only 3 of the 200 samples below it  
 145 were annotated as highly occluded—yielding a false positive rate of just 0.5%.

146 Applying this final filter removed approximately 497K ambiguous crops, resulting in 5.87M high-  
 147 quality car instances.

Table 2: Summary of dataset size after each filtering step.

| Filtering Step                        | Remaining Instances |
|---------------------------------------|---------------------|
| Raw images collected                  | 7.5M images         |
| After deduplication and car detection | 4.9M images         |
| Initial car bounding boxes            | 13.22M boxes        |
| After score/size thresholding         | 6.97M boxes         |
| After Qwen2.5-7B semantic filtering   | 6.37M boxes         |
| After overlap removal (SAM 2)         | 5.87M boxes         |

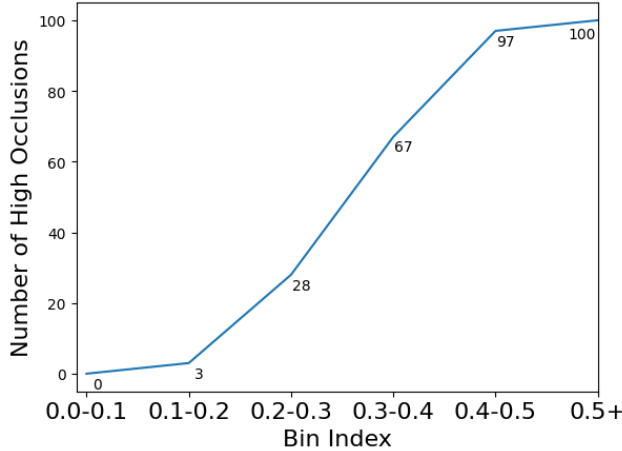

Figure 3: Number of highly occluded crops across containment ratio bins. A sharp increase in occlusion cases occurs above 0.2, motivating its selection as the filtering threshold.

### 148 A.3 Data Annotation

149 To obtain high-quality fine-grained vehicle classification labels, we design a semi-automatic an-  
 150 notation pipeline leveraging both vision-language models (VLMs) and specialized discriminative  
 151 models.

152 **Step 1: Zero-shot car model labeling with Qwen2.5-7B.** Each car crop is passed to Qwen2.5-7B  
 153 using a structured prompt:

```
154     Please identify the brand and model of the car in the image. If the
155     car is unrecognizable, respond with 'unknown'. The response should
156     be in JSON format as follows: {'brand': '...', 'model': '...',
157     'confidence': '...'}
```

158 This stage yields 3.49M non-unknown bounding boxes.

159 **Step 2: Filtering to ensure representative distributions.** To ensure each class is both sufficiently  
 160 represented and reliably annotated, we filter out brand-model pairs having less than 2,000 total crops

161 and discard year-specific subsets with less than 40 samples. This step serves two purposes: it avoids  
162 training on underrepresented classes likely to consist of outliers or rare edge cases, and it reduces the  
163 risk of including erroneous labels from Qwen2.5-7B, which are more frequent in sparsely occurring  
164 categories.

165 In addition, to improve consistency and reduce spurious predictions, we match Qwen predictions  
166 against a curated list of car models derived from Wikipedia. Starting from the full set of approxi-  
167 mately 45,000 unique brand-model combinations produced by Qwen, we apply string parsing and  
168 normalization techniques (e.g., case folding, removal of extraneous tokens) to align predictions with  
169 canonical class names. This filtering step reduces the space of valid class labels to around 300  
170 representative car models. After these filtering stages, we retain 1.88M Qwen-annotated boxes with  
171 improved label quality and distributional reliability.

172 **Step 3: Car Model Confirmation with GPT-4o.** For each Qwen-labeled crop, we prompt GPT-  
173 4o [1] using the following setup:

174 • **System prompt:**

```
175     Analyze the image and return: {  
176         "model": string, // Identified car model (return provided class  
177         if it matches)  
178         "model_probability": number, // Probability (0-100) of the  
179         predicted model  
180         "car_probability": number // Probability (0-100) that the object  
181         is a real car  
182     }  
183     Strict JSON format required.
```

184 • **User prompt:** The car model predicted by Qwen2.5-7B.

185 This stage yields 1.87M non-unknown predictions from GPT-4o. During early experimentation, we  
186 performed qualitative comparisons between Qwen2.5-7B and GPT-4o on a range of representative  
187 samples. Visual inspection suggested that GPT-4o generally produced more accurate predictions and  
188 complemented Qwen2.5-7B, particularly on difficult examples. We also observed that prompting  
189 GPT-4o with Qwen’s prediction (i.e., focused prompting) led to more reliable outputs than open-ended  
190 prompts.

191 **Step 4: Agreement filtering.** To increase label precision, we apply two filtering stages based on  
192 the outputs of Qwen2.5-7B and GPT-4o:

- 193 • **Intersection:** retain only the 1.36M boxes for which both models produce valid, non-  
194 unknown predictions.
- 195 • **Strict agreement:** from the intersection set, retain only the 963K boxes where both models  
196 predict the exact same brand and model.

197 **Step 5: Representation learning with MoCo v3.** To build a car-specific visual encoder, we  
198 pretrain a MoCo v3 [3] model with a ViT-S backbone on all 5.87 million filtered car crops, including  
199 unlabeled boxes. The model is trained for 300 epochs using the AdamW [15] optimizer with a  
200 learning rate of 1.5e-4 and a weight decay of 0.1. We adopt a cosine annealing learning rate schedule  
201 with 40 warmup epochs, and use a batch size of 2048 to ensure stable training at scale.

202 **Step 6: Fine-tuning with automatic labels.** We fine-tune the pretrained encoder using two variants  
203 of the DeiT [25] classifier: DeiT<sub>Q</sub>, trained on Qwen-labeled data, and DeiT<sub>G</sub>, trained on GPT-4o-  
204 labeled data. This stage leverages the 1,356,731 boxes for which at least one model provided a  
205 confident label, without requiring strict agreement between Qwen and GPT-4o. To improve robustness  
206 and mitigate overfitting, we perform five independent training runs with disjoint 80/20 train/test splits.  
207 Each classifier is fine-tuned for 150 epochs using the AdamW optimizer with a learning rate of 5e-4,  
208 a cosine annealing schedule with 5 warmup epochs, and a batch size of 512.

209 *Note:* These models are used solely for annotation and data cleaning. They are not used in any of  
210 the experimental evaluations (e.g., SPT, TIP, TICL) to ensure a fair and unbiased assessment of the  
211 methods under study.

212 **Step 7: Consensus filtering with discriminative models** After fine-tuning the discriminative  
 213 classifiers, we apply all four models—Qwen2.5-7B, GPT-4o, DeiT<sub>Q</sub>, and DeiT<sub>G</sub>—to the annotated  
 214 dataset and retain only the bounding boxes where all models agree on the predicted brand and model.  
 215 This consensus step further increases label reliability by ensuring agreement across both generalist  
 216 and specialized systems. As a result, we obtain 849K high-confidence annotations for 204 classes.

217 **Step 8: Manual validation and final refinement** To evaluate the quality of the consensus-labeled  
 218 dataset, we randomly sample 20,000 bounding boxes across 20 classes, specifically selecting only  
 219 high-confidence predictions. Confidence scores for Qwen2.5-7B and GPT-4o are obtained directly  
 220 from their structured prompts, where each model outputs an explicit confidence estimate along with  
 221 the predicted label. For the discriminative classifiers (DeiT<sub>Q</sub> and DeiT<sub>G</sub>), we compute confidence as  
 222 the softmax probability associated with the predicted class (i.e., the maximum logit after softmax).  
 223 We select samples where Qwen  $\geq 90\%$ , GPT-4o  $\geq 90\%$ , DeiT<sub>Q</sub>  $\geq 85\%$ , and DeiT<sub>G</sub>  $\geq 85\%$ .

224 Manual inspection is conducted using a custom annotation interface designed for efficient verification.  
 225 The interface, shown in Figure 4, displays car crops along with predictions from Qwen2.5-7B and  
 226 GPT-4o, their confidence scores, and allows annotators to flag errors. Annotators select images  
 227 for review by clicking and pressing Enter, which visually highlights the selected bounding box.  
 228 Dropdowns enable rapid switching between car classes and model years. A progress bar at the top  
 229 provides an overview of annotation coverage.

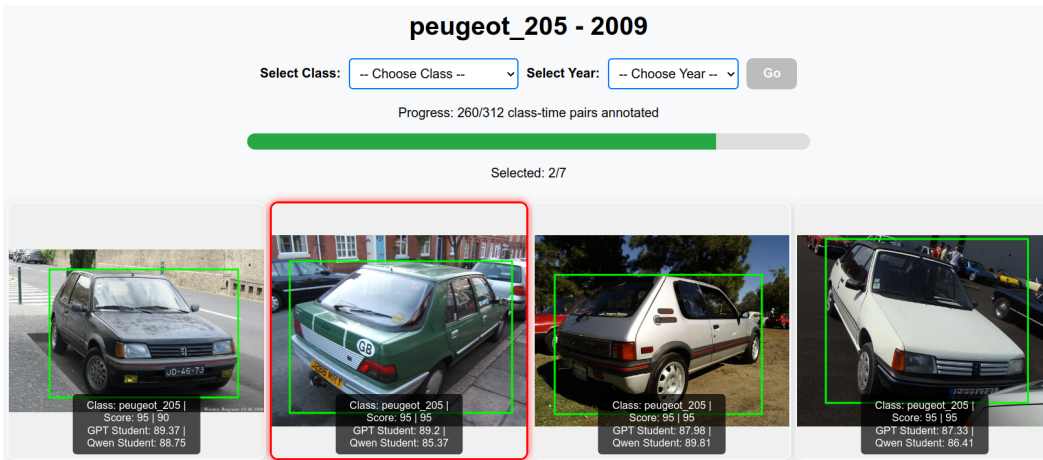

Figure 4: Annotation Interface for Fine-Grained Vehicle Classification. The interface displays car images with bounding boxes, predictions from Qwen2.5-7B and GPT-4o, and confidence scores. Users select images for manual verification by clicking on them and pressing Enter, which highlights the selected image with a red border. Dropdown menus at the top allow navigation between different car classes and years. Progress tracking is shown at the top, indicating the number of annotated class-time pairs.

230 Manual inspection of the 20,000 samples is performed by three annotators using majority voting,  
 231 and reveals an average labeling accuracy of 98.8%. Inter-annotator agreement, measured using  
 232 Fleiss’ Kappa, is 0.76. To further assess class-level reliability, we manually annotate 100 images  
 233 per class across all 204 remaining classes. Again, three annotators perform majority voting, and the  
 234 inter-annotator agreement for this task is 0.79. Based on this validation, we identify 14 classes with  
 235 consistent prediction errors, which are subsequently removed from the dataset. This final refinement  
 236 results in a dataset with an estimated annotation accuracy of 99.6%.

237 **Step 9: Temporal split with instance-level de-duplication.** To construct time-aware train/test  
 238 splits for evaluation, we uniformly sample bounding boxes across time while ensuring no image  
 239 overlap between sets. Specifically, for each model-year pair, we select 30 bounding boxes for the  
 240 test set. The remaining bounding boxes for the model-year pair are used for training, but we enforce  
 241 that no training box originates from the same source image as any test box to prevent feature leakage  
 242 through shared backgrounds or viewpoints. This de-duplication ensures that test-time evaluation

243 reflects true generalization to unseen instances rather than memorization of shared image content.  
244 After applying this sampling strategy across all classes and years, we obtain a total of 693K bounding  
245 boxes for training and 94K for testing. These subsets serve as the basis for all time-incremental  
246 experiments in the submission.

247 Throughout all classification experiments, we rely exclusively on cropped bounding boxes, treating  
248 each crop as an individual instance. This design choice ensures that models focus on the vehicle  
249 itself, reducing background noise and emphasizing class-discriminative features. In contrast, for the  
250 time-aware image generation experiments, we use the full original images containing the annotated  
251 bounding boxes. This enables modeling of broader visual context—including background scenes,  
252 co-occurring vehicles, and environmental cues—which are critical for generating realistic, temporally  
253 consistent imagery but less relevant for fine-grained recognition tasks.

254 **B Evaluation metrics**

255 We define accuracy metrics to measure the different training-test years combinations occurring  
 256 in time-aware image classification. We use the following notations:  $i$  - current training year,  $j$   
 257 - current test year,  $y_{max} = 2023$  - last training/test year,  $y_{min} = 2007$  - first training year  $r =$   
 258  $y_{max} - y_{min} + 1 = 17$  - total number of training and test years,  $A(i, j)$  - the accuracy of a classifier  
 259 trained on year  $i$  and tested on year  $j$ . Note that we could also refer to an *index* of the year with  
 260  $y_{min} = 1$  and  $y_{max} = 17$ , without changing the following.

$$\mathbf{A}_{avg} = \frac{1}{r^2} \sum_{i=y_{min}}^{y_{max}} \sum_{j=y_{min}}^{y_{max}} A(i, j) \quad (2)$$

$$\mathbf{A}_{crt} = \frac{1}{r} \sum_{i=y_{min}}^{y_{max}} A(i, i) \quad (3)$$

$$\mathbf{A}_{bck} = \frac{2}{r(r-1)} \sum_{i=y_{min}+1}^{y_{max}} \sum_{j=y_{min}}^{i-1} A(i, j) \quad (4)$$

$$\mathbf{A}_{fwd} = \frac{2}{r(r-1)} \sum_{i=y_{min}}^{y_{max}-1} \sum_{j=i+1}^{y_{max}} A(i, j) \quad (5)$$

261  $\mathbf{A}_{avg}$  (Equation 2) aggregates all model training-test year combinations evaluated in the main text.  
 262 It gives a global view of each tested system.  $\mathbf{A}_{crt}$  (Equation 3) focuses on the cases when we train  
 263 and test with images published the same year ( $i = j$ ). It aggregates scores presented on the matrix  
 264 diagonals such as those in Figure 5.  $\mathbf{A}_{bck}$  (Equation 4) averages the accuracies obtained when  $j < i$ ,  
 265 aggregating the scores from the bottom-left of the detailed matrices. It provides insights about how  
 266 well the different tested systems cope with past data.  $\mathbf{A}_{fwd}$  (Equation 5) averages the accuracies  
 267 obtained when  $j > i$ , aggregating the top-right of the detailed matrices. It reflects the systems'  
 268 behavior when encountering future test data.

## 269 C Static Pretraining

### 270 C.1 Static Model Training Procedure

271 To investigate how static pretrained models handle temporal shifts in fine-grained classification  
272 (Section 4.1), we describe our training setup. In this setting, models are pretrained once and evaluated  
273 across all years using a frozen encoder and a simple nearest class mean (NCM) classifier [17]. We  
274 report accuracy across multiple temporal splits and restrict adaptation to the first year of the labeled  
275 set.

276 **Pretrained encoders.** We evaluate both generic and domain-specific pretrained encoders:

- 277 • **DINOv2 ViT-S/ViT-B:** Official self-supervised models trained on 150M curated im-  
278 ages [18].
- 279 • **CLIP ViT-B:** Public model trained on 2B LAION images with paired text supervision [20].
- 280 • **MoCo v3 ViT-S/ViT-B:** Trained from scratch on CaMiT data (see below).

281 **MoCo v3 pretraining.** We follow the original MoCo v3 setup closely to train models from scratch  
282 on CaMiT, using 1.9M car instances from years 2005–2007 for 200 epochs. We initially attempted to  
283 fine-tune from the ImageNet-1K pretrained checkpoints provided in the official MoCo v3 repository,  
284 but observed consistently lower performance compared to training from scratch. As a result, all  
285 reported MoCo v3 models are trained from scratch on CaMiT. Our implementation preserves key  
286 design choices from MoCo v3, including optimization strategy, augmentations, and learning rate  
287 scheduling. The setup includes:

- 288 • **Optimizer:** AdamW
- 289 • **Batch size:** 2048
- 290 • **Learning rate:**  $1.5 \times 10^{-4}$
- 291 • **Scheduler:** Cosine learning rate decay
- 292 • **Augmentations:** A MoCo v3-style augmentation pipeline, including random resized crops,  
293 color jittering, Gaussian blur, horizontal flipping, and grayscale conversion.

294 **Initial LoRA adaptation ( $L_i$ ).** To enable domain adaptation while preserving encoder generality,  
295 we apply LoRA [10] to the pretrained encoders using only the labeled 2007 CaMiT training set.  
296 The backbone weights remain frozen, and only the LoRA parameters applied to the self-attention  
297 layers are updated. We implement LoRA using the Hugging Face `peft` library [16], and append a  
298 trainable linear classification head to the adapted encoder. Training is supervised with a cross-entropy  
299 loss over the car model classes.

300 The adaptation setup is as follows:

- 301 • **Optimizer:** SGD with momentum 0.9
- 302 • **LoRA rank:** 8
- 303 • **Scaling factor:** 16
- 304 • **Dropout:** 0.1
- 305 • **Epochs:** 20
- 306 • **Batch size:** 48
- 307 • **Learning rate:** 0.01
- 308 • **Weight decay:**  $5 \times 10^{-4}$
- 309 • **Augmentations:** Random resized crop to  $224 \times 224$  with scale in  $[0.9, 1.0]$  and aspect ratio  
310 in  $[0.75, 1.333]$ , using bicubic interpolation and antialiasing, followed by normalization with  
311 ImageNet mean and standard deviation.

312 This adaptation procedure was successfully applied to CLIP and MoCo v3 encoders. However, using  
313 the same LoRA configuration for DINOv2 led to unstable training and non-converging validation  
314 accuracy, even after extensive tuning of the learning rate, LoRA rank, and batch size. As such, we  
315 omit DINOv2+ $L_i$  results.

316 **Classifier.** For all static pretraining experiments, we extract  $\ell_2$ -normalized image features using the  
 317 frozen encoder—either with or without LoRA adaptation—and compute a nearest class mean (NCM)  
 318 classifier for each train year. Prototypes (i.e., class means) are computed using the training set of  
 319 that year, and evaluation is performed on each test year using all its labeled classes, regardless of  
 320 whether those classes were present in the corresponding train year. This setup reflects the realistic  
 321 challenge of generalizing to both previously seen and unseen classes across time. We use cosine  
 322 distance to assign test samples to the class with the closest mean feature vector, a standard approach  
 323 when working with normalized embeddings. Evaluation images are preprocessed with:

- 324 • **Validation transforms:** Resize to 224 pixels on the shorter side with bicubic interpolation,  
 325 center crop to  $224 \times 224$ , then normalize using ImageNet mean and standard deviation.

## 326 C.2 Additional static pretraining results

327 **DINOv2 train-test year performance.** Figure 5 presents the complete train-test accuracy matrices  
 328 for DINOv2 ViT-S and ViT-B. We excluded these heatmaps from the main submission due to  
 329 DINOv2’s consistently low performance across all year splits, but include them here for completeness  
 330 and transparency. DINOv2 exhibits substantially lower accuracy compared to all other pretrained  
 331 models evaluated. To appropriately visualize this lower range of values, we employ a different color  
 332 map and a separate color scale from that used in the main paper. This ensures that variation across  
 333 train-test year pairs remains visible, despite the overall lower performance. The poor performance  
 334 may also help explain the unstable training observed during LoRA adaptation. Unlike CLIP or MoCo  
 335 v3, which produce embeddings that are more linearly separable for fine-grained car classes, DINOv2  
 336 appears less aligned with the class boundaries relevant to this task. As a result, lightweight adaptation  
 337 methods such as LoRA may be insufficient to bridge this gap.

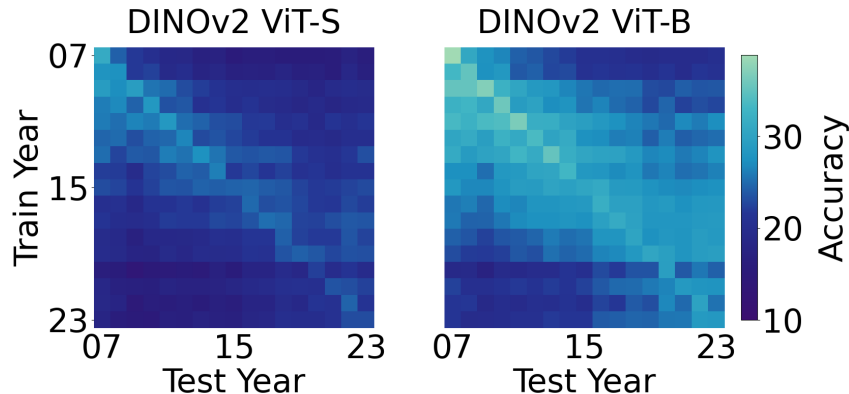

Figure 5: Full train-test accuracy matrix (%) for DINOv2 ViT-S and ViT-B. Performance is significantly below that of domain-specific or LoRA-adapted models.

338 **Statistical comparison of static pretraining variants.** To assess the robustness of the performance  
 339 differences reported in Section 4.1, we conducted pairwise statistical comparisons across all models.  
 340 For each model pair, we computed the difference between their  $17 \times 17$  train-test accuracy matrices,  
 341 flattened these into 289-element vectors, and applied a Wilcoxon signed-rank test. This test evaluates  
 342 whether one model consistently outperforms another across the temporal grid. All pairwise differences  
 343 were statistically significant ( $p < 0.01$ ), except for the comparison between CLIP-B+LoRA and  
 344 MoCo v3-B+LoRA, which yielded a p-value of 0.63. This suggests that the two models achieve  
 345 relatively similar performance, with MoCo v3-B+LoRA holding a slight edge in average accuracy.  
 346 Full test results are shown in Figure 6.

347 **Tradeoffs between CLIP adaptation and MoCo v3 pretraining.** Although the adapted MoCo v3  
 348 ViT-B slightly outperforms CLIP+ $L_i$  in static accuracy, this gain comes with a significant training  
 349 cost: MoCo v3 requires full in-domain pretraining on 1.9M car images, whereas CLIP achieves  
 350 comparable results through lightweight LoRA adaptation using only the labeled 2007 subset. CLIP’s

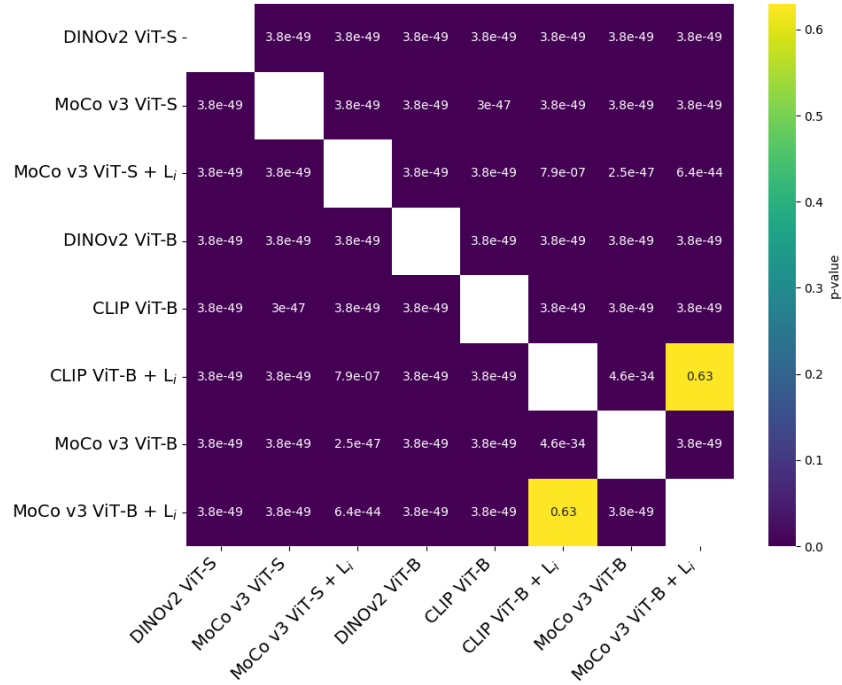

Figure 6: Wilcoxon signed-rank test results across all model pairs . All differences are statistically significant ( $p < 0.01$ ) except CLIP-B+LoRA vs. MoCo v3-B+LoRA ( $p = 0.63$ )

351 advantage is partially attributable to its large-scale pretraining on LAION-2B, which includes image-  
 352 text pairs collected up to 2021—introducing possible temporal overlap with CaMiT test years. Such  
 353 overlap may inflate CLIP’s performance on more recent data. Moreover, reproducing a CLIP-scale  
 354 model using data strictly before 2007 is currently infeasible due to compute and data limitations.  
 355 Despite these caveats, the strong performance of CLIP with minimal adaptation suggests that large-  
 356 scale generic encoders can be competitive alternatives to domain-specific models in static scenarios.  
 357 However, these conclusions are based on evaluations with a simple Nearest Class Mean (NCM)  
 358 classifier, which may underutilize the full representational capacity of the encoders. As shown  
 359 in our Time-Incremental Classifier Learning (TICL) experiments (Section 4.3), more expressive  
 360 classifiers expose a growing performance gap: specialized models such as MoCo v3 with LoRA  
 361 better consolidate temporal knowledge, while frozen encoders like CLIP plateau. This highlights the  
 362 limits of general-purpose encoders under evolving data distributions and emphasizes the importance  
 363 of considering both encoder quality and classifier capacity in continual learning.

## 364 D Time-incremental pretraining

### 365 D.1 TIP Model Training Procedure

366 While Section 4.2 outlined our reservoir-based continual pretraining strategy, here we expand on the  
367 implementation details and justify our design choices in light of recent work on efficient continual  
368 learning, notably TIC-CLIP [6].

369 Our primary goal is to assess whether time-incremental pretraining (TIP) improves downstream  
370 performance compared to static pretraining, especially under temporal distribution shifts. To do so  
371 under a fixed compute and memory budget, we adopt a streamlined yet effective training protocol  
372 inspired by the cumulative-equal memory strategy introduced in TIC-CLIP. Instead of updating a  
373 single model incrementally, we train separate model instances for each year using temporally balanced  
374 datasets that integrate both current and historical data. This design preserves the core continual  
375 learning constraint—limited access to past data—while enabling clear, interpretable comparisons  
376 across time.

377 We begin with the 2005–2007 MoCo v3 ViT-S model used in the static pretraining (SPT) baseline.  
378 For each subsequent year  $y \in Y = \{2008, \dots, 2020\}$ , we construct a 1.9 million image training set  
379 using a sequential memory accumulation scheme that mimics a time-aware reservoir buffer:

- 380 • We allocate 200,000 images from the current year  $y$ , using all available labeled and unlabeled  
381 data.
- 382 • We construct a replay memory of 1.7 million images from previous years ( $< Y$ ), updated  
383 incrementally and sampled uniformly per year.

384 The 1.9M image budget per year is directly inherited from the static pretraining setup to ensure fair  
385 comparisons. In TIP, this budget is fulfilled via replay, preserving chronological diversity while  
386 maintaining parity with the initial static training cost.

387 The replay memory is assembled chronologically. For each prior year  $y < Y$ , we sample:

$$M = \min \left( 200,000, \frac{1,700,000}{N} \right) \quad (6)$$

388 where  $N$  is the number of previous years.

389 Equation 6 ensures temporal balance, prevents over-representation of any single year, and enforces a  
390 strict global budget. Importantly, the replay memory construction is consistent across years, making  
391 performance comparisons interpretable and fair.

392 This chronologically balanced scheme follows the Cumulative-Equal strategy in TIC-CLIP [6], which  
393 showed that simple temporal replay can match the performance of more complex memory strategies  
394 while requiring significantly less compute. In our context, it also facilitates direct evaluation of how  
395 TIP closes the generalization gap left by static pretraining.

396 A practical advantage of our approach is that, once the replay memory is constructed for each year,  
397 model training can proceed independently across time steps. This enables all yearly TIP models to be  
398 trained in parallel, significantly reducing wall-clock time and making large-scale temporal evaluation  
399 feasible under fixed resource constraints. Such parallelism is especially valuable in long-horizon  
400 settings like ours, where evaluating across many years is critical for understanding the effects of  
401 temporal shifts.

402 **Variants of Time-Incremental Pretraining.** We evaluate three TIP variants, all designed to improve  
403 over static pretraining by leveraging temporal supervision. These variants differ in how they incorpo-  
404 rate past data—via full retraining or adapter tuning—but share the same underlying goal: increasing  
405 robustness to time-evolving data.

- 406 • **Reservoir-Based TIP (Full Model Retraining, R):** For each year  $Y$ , we train a new  
407 model from scratch using 1.9M images composed of 200K current-year samples and 1.7M  
408 temporally balanced samples from earlier years, as described above. This serves as our  
409 default approach and provides a strong baseline for evaluating the benefits of replay in a  
410 controlled, time-aware setting.

- 411 • **Sequential LoRA Adaptation ( $L_c$ ):** Starting from the static 2005–2007 model, we fine-tune LoRA adapters year by year using only the *labeled data from the current year*. LoRA weights are updated incrementally, allowing the model to adapt with minimal additional compute. This variant reflects a practical, low-cost way to continually adapt a model over time, and corresponds to ‘ $L_c$ ’ in Table 2 of the main submission.
- 416 • **Reservoir-Based LoRA Adaptation ( $L_a$ ):** In this hybrid approach, we apply LoRA fine-tuning on top of the frozen backbone trained using reservoir-based TIP. For each year  $Y$ , LoRA adapters are updated using all *labeled data from years  $\leq Y$* . Unlike the sequential version, this avoids weight accumulation and allows us to evaluate LoRA under the same memory constraints as full retraining. This variant corresponds to ‘ $L_a$ ’ in Table 2.

421 While these strategies differ in computational and memory tradeoffs, they all significantly outperform static pretraining (Table 2 of the main text), demonstrating the value of TIP in mitigating temporal degradation. Sequential LoRA offers an efficient, real-world adaptation pathway, while reservoir-based variants serve as a controlled baseline to study the long-term effects of data replay.

425 **Training Details.** For reservoir-based TIP models, we initialize from the static MoCo v3 ViT-S model (trained on 2005–2007) and train each yearly instance from scratch using the replay buffer. We follow the same optimization settings as in static pretraining, but reduce the base learning rate to  $1 \times 10^{-4}$  and train for 60 epochs to account for the model’s prior pretraining and the moderate adaptation required each year.

430 For LoRA-based variants, we fine-tune only the adapter weights using labeled data. Each yearly update is performed for 20 epochs with a batch size of 48, using SGD with momentum 0.9, weight decay 0.0005, and a cosine annealing learning rate scheduler with a base learning rate of 0.01. These settings reflect the lightweight nature of LoRA adaptation and are chosen to ensure stable incremental updates with limited compute.

## 435 D.2 Additional TIP Results

436 Due to time and compute constraints, we were unable to complete full model retraining or reservoir-based LoRA adaptation for CLIP and MoCo v3 ViT-B. However, we provide results for sequential LoRA adaptation on both models. These results show that even lightweight adapter tuning offers clear performance gains over static pretraining in the presence of temporal distribution shifts for larger models like ViT-B (see Figure 7).

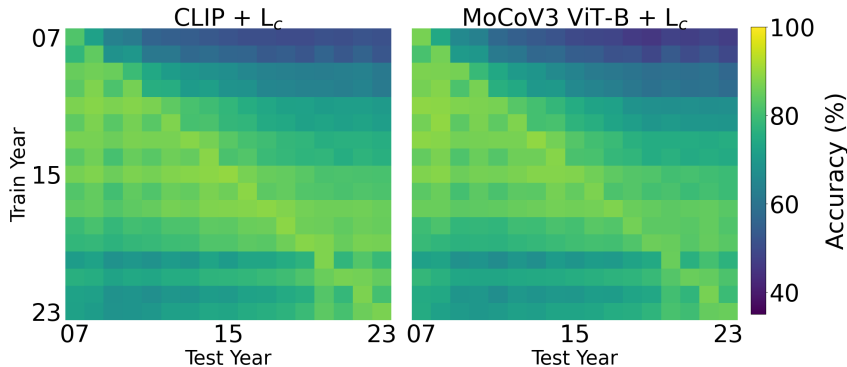

Figure 7: Train-test accuracy matrix (%) for CLIP ViT-B and MoCo v3 ViT-B across years. TIP via sequential LoRA adaptation leads to consistent gains over static pretraining, improving robustness to forward and backward temporal shifts

441 To quantify the performance gains of TIP over static pretraining, we performed pairwise statistical comparisons between each TIP variant and its corresponding static baseline. For each model pair, we computed the difference between their  $17 \times 17$  train-test accuracy matrices, flattened these into 289-element vectors, and applied a Wilcoxon signed-rank test. All comparisons yielded statistically significant improvements in favor of TIP ( $p < 0.01$ ), indicating that TIP models consistently

446 outperform static models across temporal evaluation points. These results highlight the robustness  
 447 and generalizability of TIP’s temporal adaptation. Full statistical test results are shown in Figure 8.

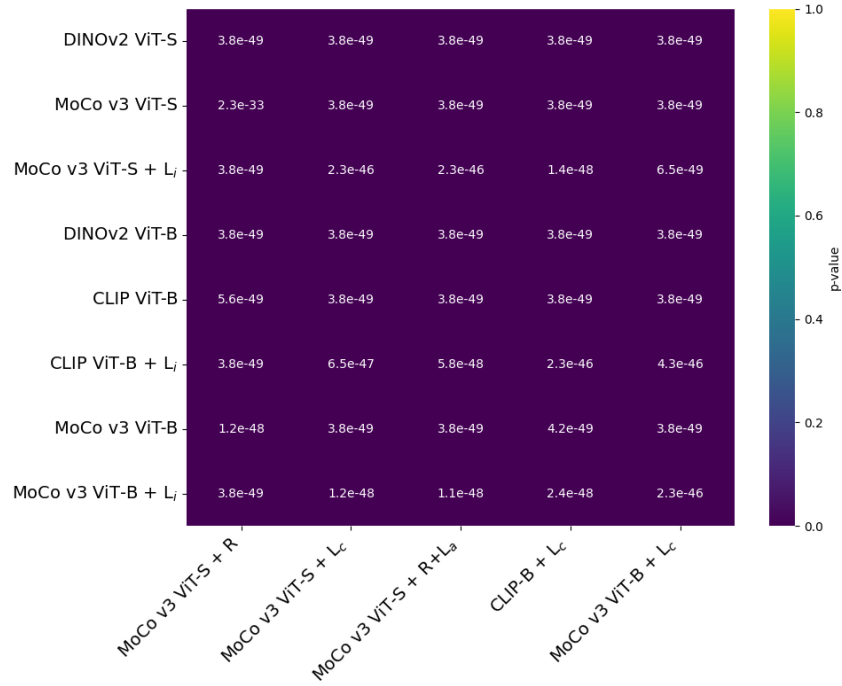

Figure 8: Statistical test results comparing TIP and static pretraining variants. Each cell shows the  $p$ -value from a Wilcoxon signed-rank test comparing one TIP model (columns) to a static model (rows) over the full  $17 \times 17$  temporal accuracy grid. All comparisons are significant at  $p < 0.01$ .

448 **TIP variant comparison.** To support the findings in Section 4.2 of the main paper, we report  
 449 statistical comparisons between the TIP variants—reservoir-only (R), sequential LoRA (Lc), and  
 450 combined LoRA with reservoir (R+La)—across ViT-S and ViT-B backbones. As shown in Figure 9,  
 451 nearly all pairwise differences are statistically significant ( $p < 0.01$ ), with the exception of MoCo  
 452 v3 ViT-S + Lc versus CLIP ViT-B + Lc ( $p = 0.67$ ). Interestingly, MoCo v3 ViT-S + Lc slightly  
 453 outperforms MoCo v3 ViT-B + Lc across all TIP metrics, suggesting that higher model capacity  
 454 does not necessarily yield better temporal generalization under lightweight adaptation. These results  
 455 complement our static pretraining analysis (Appendix C), where CLIP performed well with limited  
 456 adaptation. In the TIP setting, its strong performance persists under sequential LoRA. However,  
 457 the use of simple Nearest Class Mean classifiers may underutilize the full representational capacity  
 458 of different encoders, compressing performance differences. As we explore in Appendix E, these  
 459 differences become more pronounced when more expressive classifiers are introduced in the T1CL  
 460 setting—highlighting the limitations of frozen, generic models under long-term temporal shift.

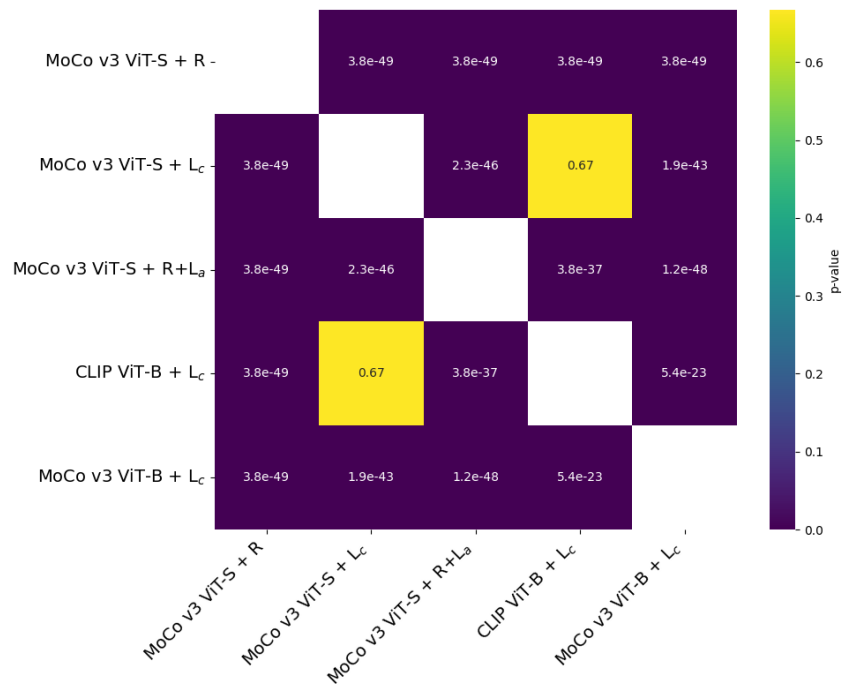

Figure 9: Statistical test results comparing TIP variants. Each cell shows the  $p$ -value from a Wilcoxon signed-rank test comparing two TIP models (R: reservoir-only, Lc: LoRA-only, R+La: combined) over the flattened  $17 \times 17$  accuracy matrix. All differences are significant at  $p < 0.01$ .

## 461 E Time-incremental classifier learning

### 462 E.1 TIDL Methods: Training Procedure

463 In Section 4.3, we experimented with Time-Incremental Classifier Learning (TIDL) as a lightweight  
 464 and effective strategy to adapt classifiers over time without retraining the backbone. Unlike Time-  
 465 Incremental Pretraining (TIP), TIDL freezes the feature extractor and updates only the classifier  
 466 incrementally as new data becomes available each year. This modular approach reduces computational  
 467 cost and memory usage by freezing the encoder, while enabling incremental classifier adaptation to  
 468 evolving data distributions. Below, we detail the implementation of the four TIDL methods evaluated  
 469 in our experiments: NCM-TI, FeCAM, RanDumb, and RanPAC.

470 **NCM-TI** This method extends the standard Nearest Class Mean (NCM) classifier to handle incre-  
 471 mental data arrival. Each class  $c$  is represented by a prototype  $\mu_c \in \mathbb{R}^d$  computed as the mean of its  
 472 feature embeddings. In the time-incremental setting, these prototypes are updated proportionally with  
 473 each year’s new samples. Let  $f(x)$  denote the frozen encoder output,  $n_{\text{old}}$  the number of accumulated  
 474 samples up to year  $y-1$ , and  $n_{\text{new}}$  the number of new samples in year  $y$ . Then:

$$\mu_c^{(y)} = \frac{n_{\text{old}} \cdot \mu_c^{(y-1)} + \sum_{i=1}^{n_{\text{new}}} f(x_i)}{n_{\text{old}} + n_{\text{new}}} \quad (7)$$

475 Equation 7 defines the incremental update rule for NCM-TI. Inference is performed using the cosine  
 476 similarity between a test feature  $f(x_{\text{test}})$  and each class prototype. This method requires no storage  
 477 of past data or per-class covariance, ensuring low overhead. As in the original NCM, no second-order  
 478 statistics are maintained. For  $C = 190$  and  $d = 768$ , this method adds 146K paramters, with one  
 479 768-dimensional prototype per class.

480 **FeCAM** FeCAM enhances NCM by modeling class-wise uncertainty via covariance matrices. For  
 481 each class  $c$ , it maintains both a prototype  $\mu_c \in \mathbb{R}^d$  and a second-order moment matrix  $S_c \in \mathbb{R}^{d \times d}$ .  
 482 They are updated incrementally using linear weighting based on sample counts. Let  $\mu_c^{(y-1)}$  and  
 483  $S_c^{(y-1)}$  be the previous estimates:

$$\mu_c^{(y)} = \frac{n_{\text{old}} \cdot \mu_c^{(y-1)} + \sum_{i=1}^{n_{\text{new}}} f(x_i)}{n_{\text{old}} + n_{\text{new}}} \quad (8)$$

$$S_c^{(y)} = \frac{n_{\text{old}} \cdot S_c^{(y-1)} + \sum_{i=1}^{n_{\text{new}}} f(x_i) f(x_i)^\top}{n_{\text{old}} + n_{\text{new}}} \quad (9)$$

484 The empirical class covariance is then computed as:

$$\Sigma_c^{(y)} = S_c^{(y)} - \mu_c^{(y)} \mu_c^{(y)\top} \quad (10)$$

485 Equations 8, 9, and 10 jointly define FeCAM’s update rule. Inference is performed via Mahalanobis  
 486 distance using  $\mu_c^{(y)}$  and  $\Sigma_c^{(y)}$ . This approach better captures class distributions at the cost of storing a  
 487 covariance matrix per class. For  $C = 190$  and  $d = 768$ , FeCAM adds 112.6M parameters (146K for  
 488 class means and 112.5M for class covariances).

489 **RanDumb** RanDumb projects features into a high-dimensional space using a fixed nonlinear mapping  
 490 via a random RBF kernel. Here,  $\phi_{\text{RBF}}(\cdot)$  denotes a fixed random feature approximation of an RBF  
 491 kernel. Let  $f(x) \in \mathbb{R}^d$  be the frozen backbone output and  $\phi_{\text{RBF}}(f(x)) \in \mathbb{R}^r$  the projected feature,  
 492 where  $r = 10,000$ . Each class maintains a prototype  $\mu_c \in \mathbb{R}^r$ , updated incrementally over time:

$$\mu_c^{(y)} = \frac{n_{\text{old}} \cdot \mu_c^{(y-1)} + \sum_{i=1}^{n_{\text{new}}, y_i=c} \phi_{\text{RBF}}(f(x_i))}{n_{\text{old}} + n_{\text{new}}} \quad (11)$$

493 To capture feature variability, a shared second-order moment matrix  $S \in \mathbb{R}^{r \times r}$  is maintained across  
 494 all classes:

$$S^{(y)} = \frac{n_{\text{old}} \cdot S^{(y-1)} + \sum_{i=1}^{n_{\text{new}}} \phi_{\text{RBF}}(f(x_i))\phi_{\text{RBF}}(f(x_i))^{\top}}{n_{\text{old}} + n_{\text{new}}} \quad (12)$$

495 The shared covariance matrix  $\Sigma$  is then computed as:

$$\Sigma^{(y)} = S^{(y)} - \mu_{\text{all}}^{(y)}\mu_{\text{all}}^{(y)\top} \quad (13)$$

496 where  $\mu_{\text{all}}^{(y)}$  is the global mean of all projected training samples. Equation 11 defines the class  
 497 prototype update, Equation 12 defines the shared second-order statistics, and Equation 13 computes  
 498 the shared covariance matrix. The empirical covariance is regularized using Oracle Approximating  
 499 Shrinkage (OAS) for stability. Inference is performed with Mahalanobis distance using  $\Sigma^{(y)}$ . For  
 500  $C = 190$  and  $r = 10,000$ , this method adds 101.9M parameters (1.9M for class prototypes and 100M  
 501 for the shared covariance).

502 **RanPAC** RanPAC performs classification via regression in a high-dimensional random feature space.  
 503 Let  $\phi(f(x)) = Wf(x) \in \mathbb{R}^r$  denote a linear projection with  $W \in \mathbb{R}^{r \times d}$  randomly initialized and  
 504 fixed, and  $r = 10,000$ . For each sample  $x_{y,n}$  in year  $y$  with one-hot label  $y_{y,n}$ , let  $h_{y,n} = \phi(f(x_{y,n}))$ .  
 505 The algorithm accumulates the matrices:

$$G = \sum_{y=1}^Y \sum_{n=1}^{N_y} h_{y,n}h_{y,n}^{\top} \quad (14)$$

$$C = \sum_{y=1}^Y \sum_{n=1}^{N_y} h_{y,n}y_{y,n}^{\top} \quad (15)$$

506 At inference, given a test instance  $x_{\text{test}}$ , the class score vector is computed as:

$$s = \phi(f(x_{\text{test}}))^{\top} (G + \lambda I)^{-1} C \quad (16)$$

507 where  $\lambda$  is a regularization parameter selected via cross-validation. Equations 14, 15, and 16 fully  
 508 define RanPAC’s training and inference logic. For  $r = 10,000$  and  $C = 190$ , RanPAC adds 101.9M  
 509 parameters (100M for matrix  $G$  and 1.9M for matrix  $C$ ).

## 510 E.2 Additional TICL Results

511 We present the full time-incremental accuracy matrices for all five TICL methods across the eight  
 512 evaluated backbones. Each heatmap is a  $17 \times 17$  matrix showing classifier accuracy when training  
 513 on one year and testing on another. Rows represent training years and columns represent test years.  
 514 These visualizations provide insights into both forward and backward transfer over time.

515 Figures 10 and 11 show the results for all eight backbones. Each figure contains four rows, where  
 516 each row corresponds to a different backbone. Within each row, the five methods NCM, NCM-TI,  
 517 FeCAM, RanDumb, and RanPAC are shown as adjacent heatmaps. This layout highlights how  
 518 different backbones affect temporal generalization behavior.

519 **Statistical comparisons.** To support the observations made in Section 4.3, we conducted statistical  
 520 significance tests for both TIP and TICL configurations under time-incremental evaluation. Figure 12  
 521 compares the performance of all TIP variants (R, Lc, R+La), trained from the static MoCo v3 ViT-S  
 522 backbone, against TICL methods (NCM, NCM-TI, FeCAM, RanDumb, RanPAC), evaluated using  
 523 the same backbone but with an initial LoRA adaptation trained on 2007 data. All comparisons are  
 524 statistically significant ( $p < 0.01$ ), indicating that the TICL methods consistently outperform TIP  
 525 variants in this setting. This suggests that advanced classifier updates can more effectively exploit  
 526 representational capacity than lightweight encoder updates alone.

527 Separately, Figure 13 reports pairwise statistical tests across TICL methods using the same MoCo  
 528 v3 encoder. All differences are statistically significant at  $p < 0.05$ , with most well below  $p < 0.01$ .

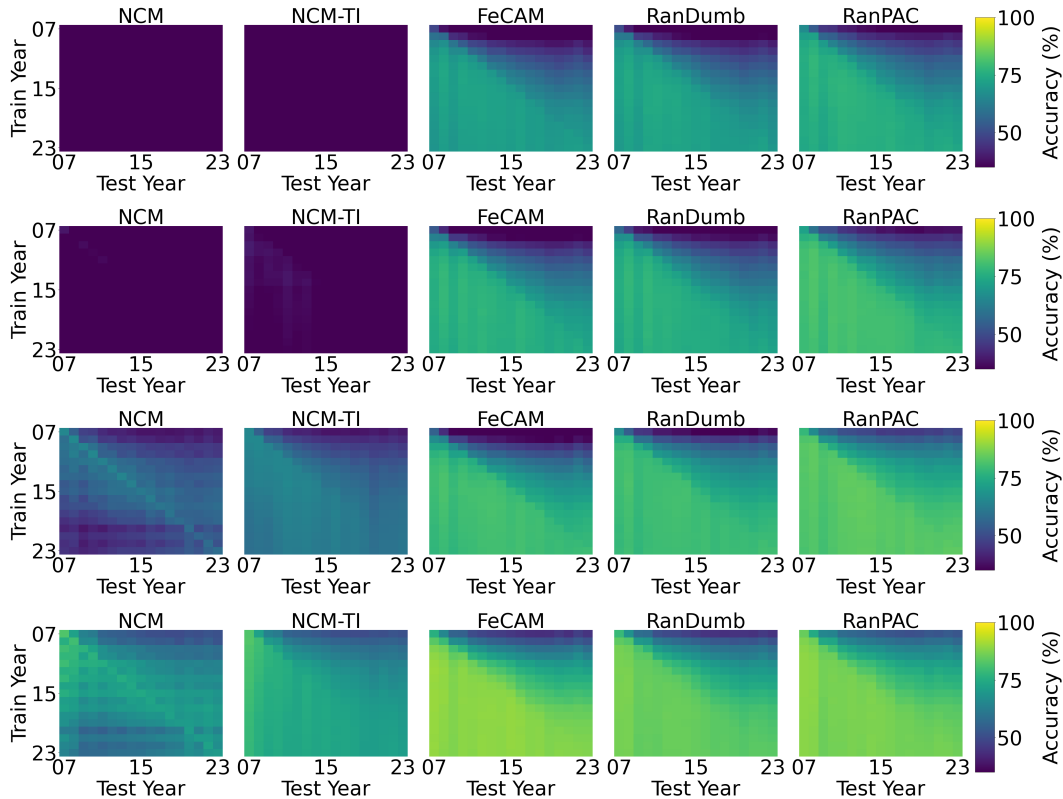

Figure 10: TICL accuracy matrices for (a) DINOv2 ViT-S, (b) DINOv2 ViT-B, (c) CLIP ViT-B, (d) CLIP ViT-B with LoRA.

529 The closest result occurs between FeCAM and RanPAC ( $p = 0.019$ ), indicating that while RanPAC  
 530 typically leads in accuracy, its advantage over FeCAM is modest. Overall, these results confirm that  
 531 more expressive classifiers—particularly RanPAC, FeCAM, and RanDumb—consistently outperform  
 532 simpler baselines such as NCM and NCM-TI under long-term incremental evaluation.

533 To further analyze generalization under time-incremental settings, we compare **CLIP ViT-B** +  $L_i$   
 534 and **MoCo v3 ViT-B** +  $L_i$  using various TICL methods. As shown in Figure 14, the difference  
 535 between the two models is not statistically significant under the NCM classifier ( $p = 0.63$ )—as  
 536 previously observed in the static pretraining analysis (Appendix C). However, when paired with more  
 537 expressive TICL methods such as FeCAM, RanDumb, and RanPAC, MoCo v3 +  $L_i$  consistently  
 538 outperforms CLIP +  $L_i$ , with statistically significant differences ( $p < 0.01$ ). These methods more  
 539 effectively exploit the structure of learned features, revealing the added benefit of domain-specific  
 540 pretraining. While CLIP continues to perform robustly, these results demonstrate that specialized  
 541 encoders—when combined with lightweight tuning—offer superior long-term generalization when  
 542 classification complexity increases. This highlights the importance of jointly considering encoder  
 543 specialization and classifier expressiveness for sustained performance under temporal shift.

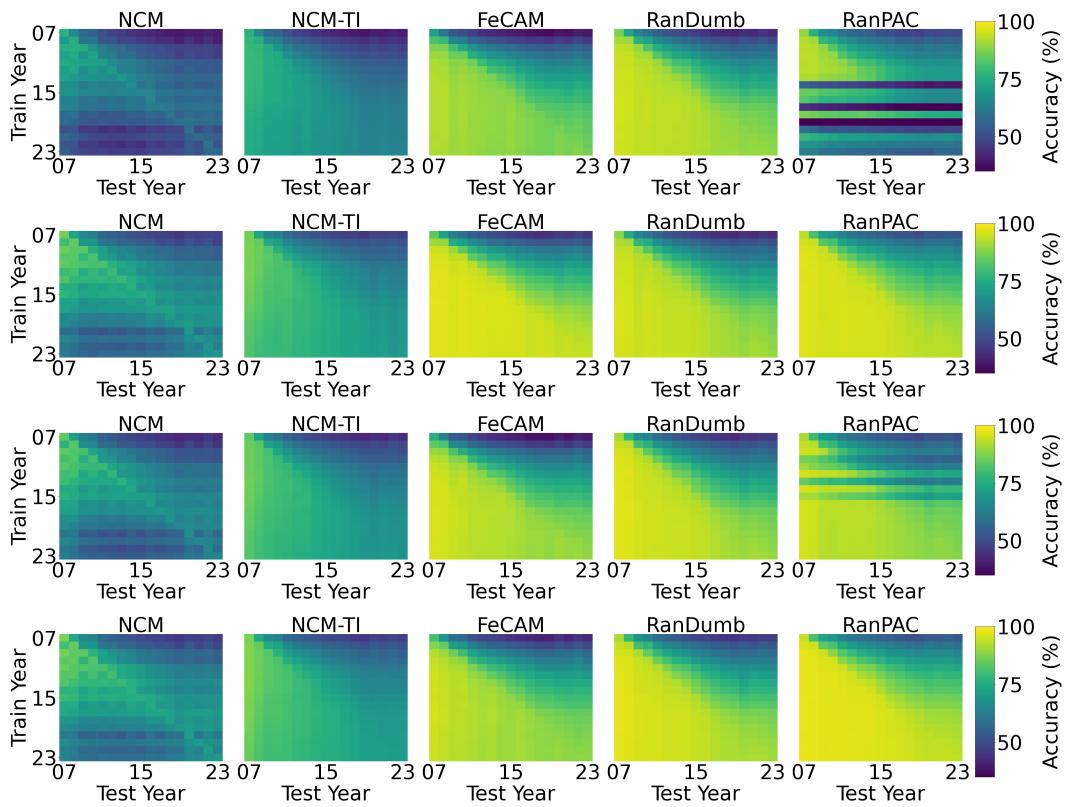

Figure 11: TICL accuracy matrices for (e) MoCo v3 ViT-S, (f) MoCo v3 ViT-S with LoRA, (g) MoCo v3 ViT-B, (h) MoCo v3 ViT-B with LoRA.

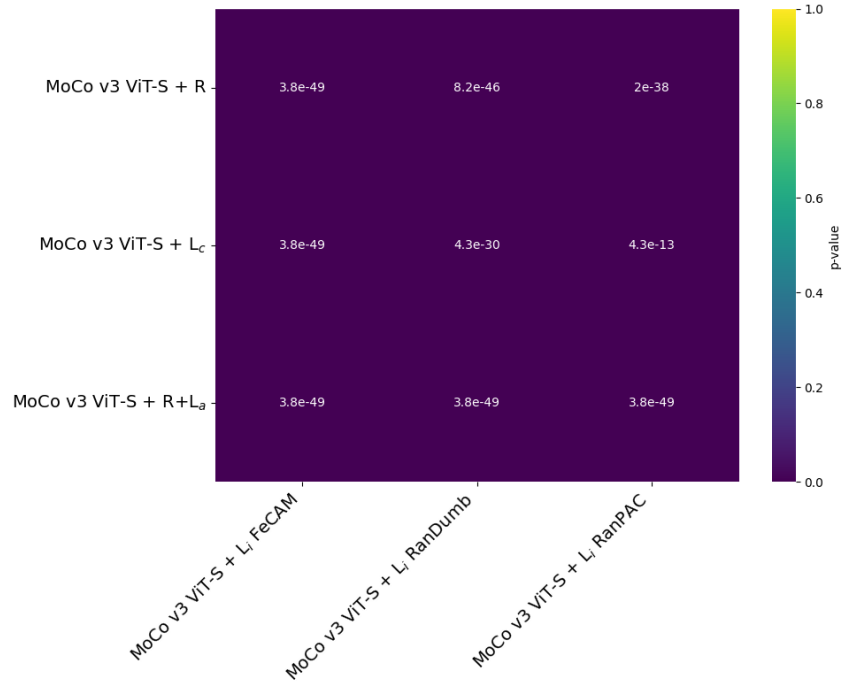

Figure 12: Statistical test results comparing TIP variants (R, Lc, R+La) against TICL methods (NCM, NCM-TI, FeCAM, RanDumb, RanPAC) using MoCo v3 ViT-S with initial LoRA adaptation. Each cell shows the  $p$ -value from a Wilcoxon signed-rank test based on the  $17 \times 17$  accuracy matrix. All comparisons are significant at  $p < 0.01$ .

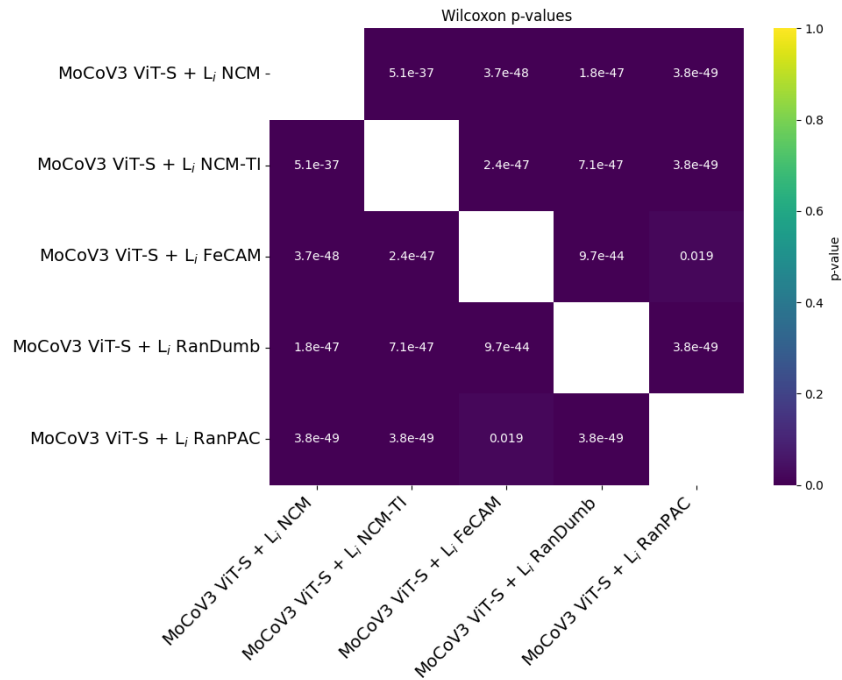

Figure 13: Statistical test results comparing TICL methods (NCM, NCM-TI, FeCAM, RanDumb, RanPAC) using MoCo v3 ViT-S with initial LoRA adaptation. Each cell shows the  $p$ -value from a Wilcoxon signed-rank test based on the  $17 \times 17$  accuracy matrix. All comparisons are significant at  $p < 0.01$ .

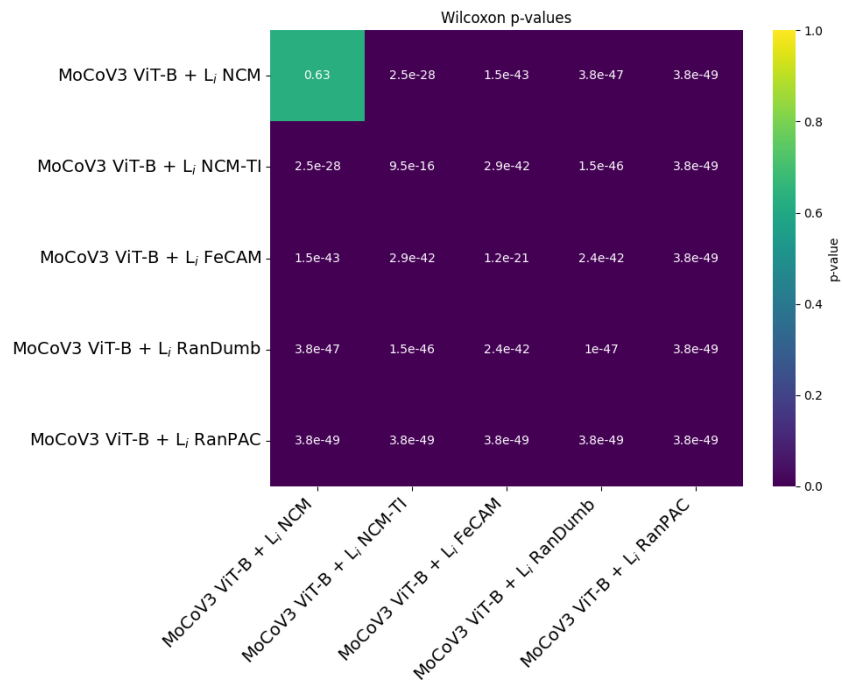

Figure 14: Statistical test results comparing CLIP ViT-B and MoCo v3 ViT-B with LoRA adaptation across different TICL methods. Each cell shows the  $p$ -value from a Wilcoxon signed-rank test based on the  $17 \times 17$  accuracy matrix. While the difference is not significant under NCM ( $p = 0.63$ ), it becomes highly significant ( $p < 0.01$ ) with more expressive classifiers such as FeCAM, Randumb, and RanPAC.

## 544 **F Time-aware image generation**

### 545 **F.1 Generative model fine-tuning procedure**

546 We implemented a custom dataset that loads 655,681 image-caption pairs. For the SD1.5<sub>TAIG</sub> model,  
547 each caption is formatted as “A photo of a {car\_model} in {year}”, with images organized into  
548 corresponding car class and year folders. For the SD1.5<sub>FT</sub> model, captions follow the format “A  
549 photo of a {car\_model}”, with images grouped by car class folders. Both models were trained for 30  
550 epochs with a batch size of 64, totaling 307,380 optimization steps. So SD1.5<sub>TAIG</sub> learn temporal  
551 variations for year-specific generation, while SD1.5<sub>FT</sub> focuses on general car model representation.

552 Our models use pretrained Stable Diffusion 1.5 [23] components: a frozen VAE, UNet, and CLIP  
553 text encoder. Only LoRA adapters are trained, which are inserted into the UNet’s attention layers,  
554 targeting the key, query, value, and output projection modules. This adds approximately 12.75 million  
555 trainable LoRA parameters, roughly 1.4% of the full Stable Diffusion 1.5 backbone.

556 Our training follows the diffusion framework: input images are first encoded into a latent representa-  
557 tion by the frozen VAE. Gaussian noise is then added to these latents according to randomly sampled  
558 timesteps, simulating the forward diffusion process. The UNet takes the noisy latents along with  
559 corresponding text embeddings from the frozen CLIP text encoder and predicts the noise component  
560 at each timestep. The model is trained to minimize the mean squared error (MSE) between its  
561 predicted noise and the true noise added, which can be optionally reweighted by a signal-to-noise  
562 ratio (SNR) factor to emphasize learning on certain noise levels.

563 Optimization uses AdamW with a constant learning rate of  $1 \times 10^{-4}$ , batch size 64 and mixed  
564 precision = bf16. Training is managed via the Hugging Face Accelerate library [9], with gradient  
565 accumulation and clipping settings to ensure stable distributed training.

### 566 **F.2 Visualizing Temporal Dynamics in Generated Samples**

567 We evaluate whether the generated images reflect temporal variation present in the corresponding real  
568 image distributions. We focused and generated models with the highest class dynamics ranked using  
569 real image distributions and checked whether their generative counterparts show similar temporal  
570 shifts. In comparison, the zero-shot generations lacked temporal differentiation, often repeating  
571 similar visual features regardless of the input year. Below, we show results for two high-dynamics  
572 classes: Ford Taurus (Figure 15) and Dodge Durango (Figure 16)

## Ford Taurus

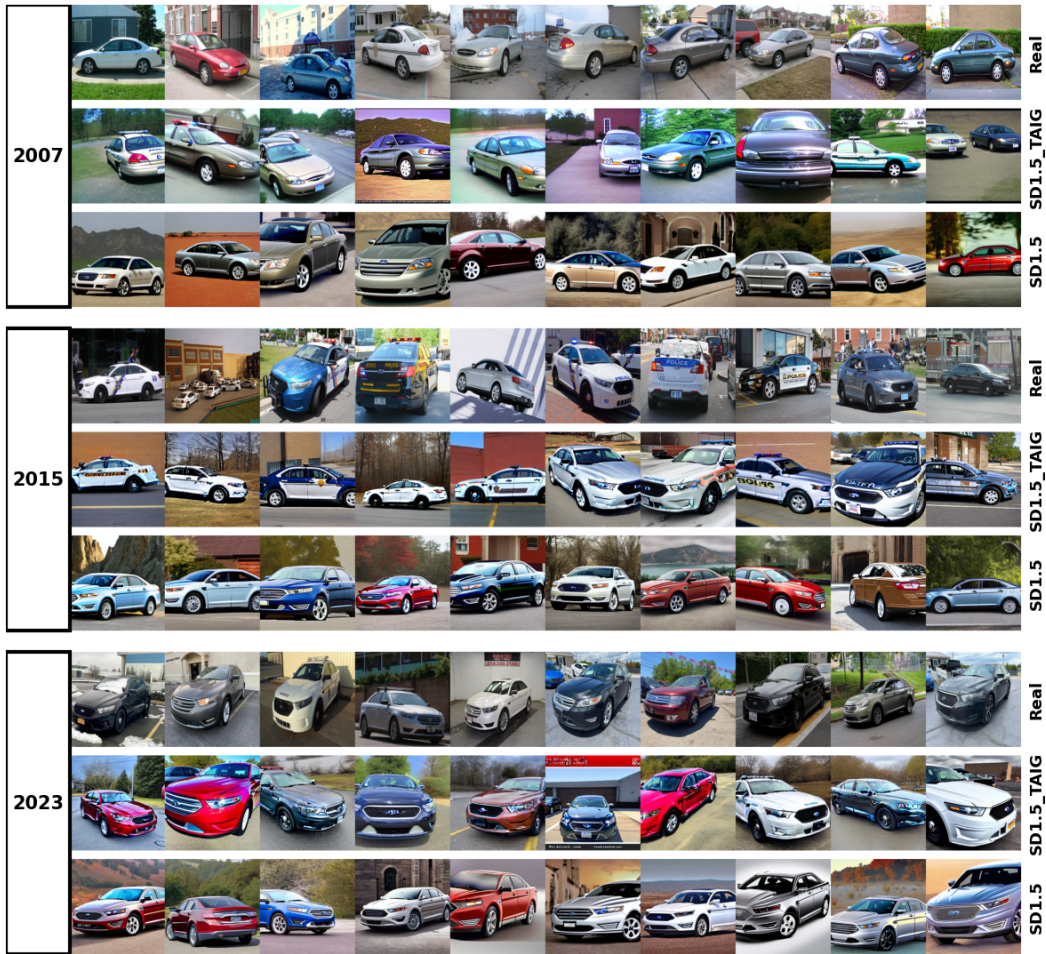

Figure 15: Temporal comparison of visual changes for the **Ford Taurus** class, arranged in a 9-row by 10-column grid. Rows are grouped by year (2007, 2015, 2023) and data source: real images (rows 1, 4, 7), fine-tuned  $SD1.5_{TAIG}$  generations (rows 2, 5, 8), and zero-shot generations (rows 3, 6, 9). Each cell contains one of 10 image samples per row. Real images show distinct changes over time. Finetuned generations from  $SD1.5_{TAIG}$  also capture these temporal trends. In contrast, zero-shot generations appear largely invariant to year conditioning, often repeating similar images across time.

## Dodge Durango

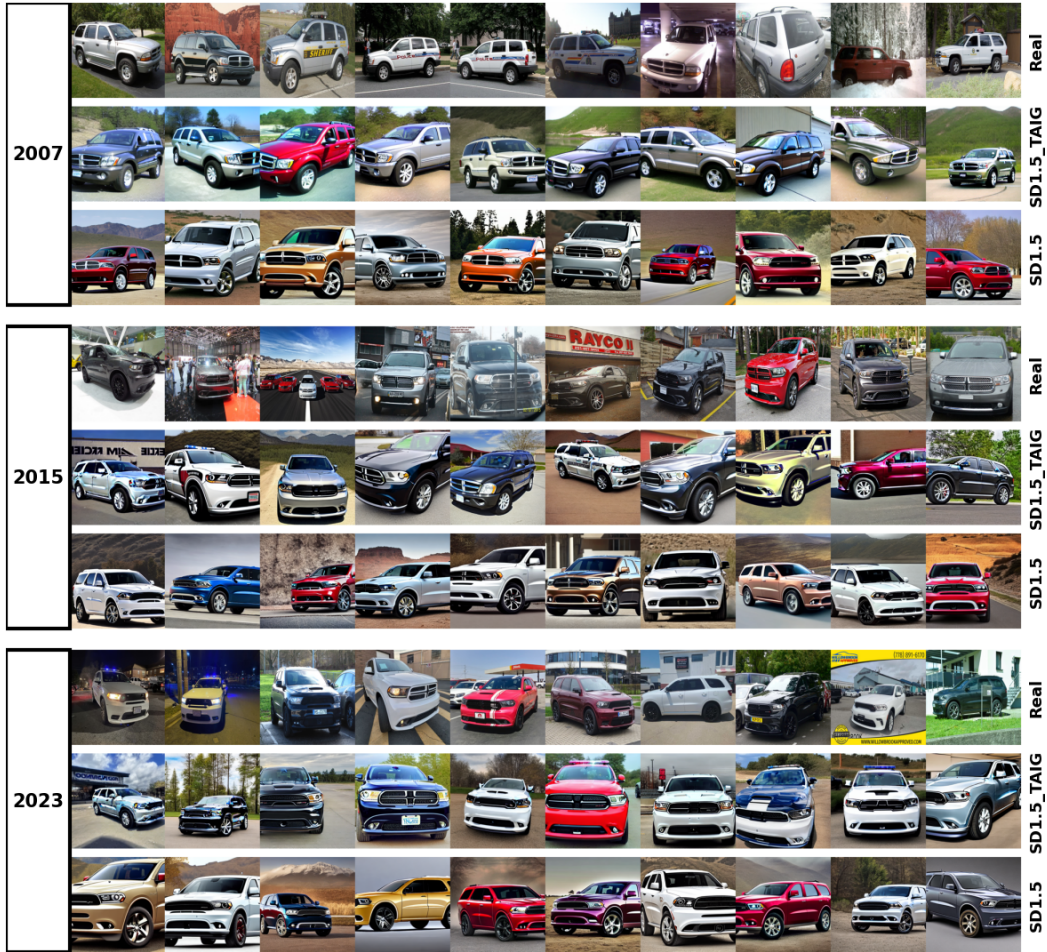

Figure 16: Temporal comparison of visual changes for the **Dodge Durango** class, arranged in a 9-row by 10-column grid. Rows are grouped by year (2007, 2015, 2023) and data source: real images (rows 1, 4, 7), fine-tuned  $SD1.5_{TAIG}$  generations (rows 2, 5, 8), and zero-shot generations (rows 3, 6, 9). While real images show clear shifts over time, only the  $SD1.5_{TAIG}$  generations reflect these changes. Zero-shot outputs again fail to capture temporal variation, often producing similar outputs across years.

## 573 G Experiment Costs

### 574 G.1 GPU Hours

575 In total, we estimate that approximately **1300 A100-hours** were used to run the experiments presented  
576 in the main paper. This includes model pretraining, time-incremental learning, classifier evaluations,  
577 and image generation. Most experiments were conducted on local infrastructure, sometimes using  
578 multi-GPU setups.

579 In addition to the GPU-hours estimation reported above, we spent approximately **4100 A100-hours**  
580 for dataset creation. The bulk of this compute was consumed by Qwen-based vision-language  
581 inference used for large-scale filtering and annotation. We cannot reliably estimate the GPU-hours  
582 required for ChatGPT-based annotation, but we can safely assume they are similar or higher than  
583 those of Qwen. With this assumption, the total number of GPU-hours needed to construct the dataset  
584 amounts to approximately **9300 A100-hours or more**.

### 585 G.2 Monetary Cost

586 The estimated monetary cost for GPT-based annotation and filtering is approximately **\$638.83**, based  
587 on GPT API usage. All GPT queries were submitted via the batch API, which reduces costs by half  
588 compared to unbatched inference.

589 Additionally, manual annotation was conducted over **56.1 hours** and compensated at an hourly rate  
590 of **\$12**, resulting in a total labor cost of **\$673.20**.

## 591 References

- 592 [1] Josh Achiam, Steven Adler, Sandhini Agarwal, Lama Ahmad, Ilge Akkaya, Florencia Leoni  
593 Aleman, Diogo Almeida, Janko Altenschmidt, Sam Altman, Shyamal Anadkat, et al. GPT-4  
594 technical report. *arXiv preprint arXiv:2303.08774*, 2023.
- 595 [2] Jinze Bai, Shuai Bai, Yunfei Chu, Zeyu Cui, Kai Dang, Xiaodong Deng, Yang Fan, Wenbin  
596 Ge, Yu Han, Fei Huang, Binyuan Hui, Luo Ji, Mei Li, Junyang Lin, Runji Lin, Dayiheng Liu,  
597 Gao Liu, Chengqiang Lu, Keming Lu, Jianxin Ma, Rui Men, Xingzhang Ren, Xuancheng Ren,  
598 Chuanqi Tan, Sinan Tan, Jianhong Tu, Peng Wang, Shijie Wang, Wei Wang, Shengguang Wu,  
599 Benfeng Xu, Jin Xu, An Yang, Hao Yang, Jian Yang, Shusheng Yang, Yang Yao, Bowen Yu,  
600 Hongyi Yuan, Zheng Yuan, Jianwei Zhang, Xingxuan Zhang, Yichang Zhang, Zhenru Zhang,  
601 Chang Zhou, Jingren Zhou, Xiaohuan Zhou, and Tianhang Zhu. Qwen technical report. *arXiv*  
602 *preprint arXiv:2309.16609*, 2023.
- 603 [3] Xinlei Chen, Saining Xie, and Kaiming He. An empirical study of training self-supervised  
604 vision transformers. In *Proceedings of the IEEE/CVF international conference on computer*  
605 *vision*, pages 9640–9649, 2021.
- 606 [4] Jia Deng, Wei Dong, Richard Socher, Li-Jia Li, Kai Li, and Li Fei-Fei. ImageNet: A large-  
607 scale hierarchical image database. In *2009 IEEE conference on Computer Vision and Pattern*  
608 *Recognition*, pages 248–255. IEEE, 2009.
- 609 [5] Samir Yitzhak Gadre, Gabriel Ilharco, Alex Fang, Jonathan Hayase, Georgios Smyrnis, Thao  
610 Nguyen, Ryan Marten, Mitchell Wortsman, Dhruva Ghosh, Jieyu Zhang, et al. Datacomp:  
611 In search of the next generation of multimodal datasets. *Advances in Neural Information*  
612 *Processing Systems*, 36:27092–27112, 2023.
- 613 [6] Saurabh Garg, Hadi Pour Ansari, Mehrdad Farajtabar, Sachin Mehta, Raviteja Vemulapalli,  
614 Oncel Tuzel, Vaishaal Shankar, and Fartash Faghri. TiC-CLIP: Continual training of CLIP  
615 models. In *ICLR*, 2024.
- 616 [7] Google. Google api python client. [https://github.com/googleapis/  
617 google-api-python-client](https://github.com/googleapis/google-api-python-client).
- 618 [8] Google Developers. Custom search json api. [https://developers.google.com/  
619 custom-search/v1/overview](https://developers.google.com/custom-search/v1/overview).

- 620 [9] Sylvain Gugger, Lysandre Debut, Thomas Wolf, Philipp Schmid, Zachary Mueller, Sourab  
621 Mangrulkar, Marc Sun, and Benjamin Bossan. Accelerate: Training and inference at scale made  
622 simple, efficient and adaptable. <https://github.com/huggingface/accelerate>, 2022.
- 623 [10] Edward J Hu, Yelong Shen, Phillip Wallis, Zeyuan Allen-Zhu, Yuanzhi Li, Shean Wang,  
624 Lu Wang, Weizhu Chen, et al. LoRA: Low-rank adaptation of large language models. *ICLR*,  
625 1(2):3, 2022.
- 626 [11] Mark J Huiskes and Michael S Lew. The mir flickr retrieval evaluation. In *Proceedings of the*  
627 *1st ACM international conference on Multimedia information retrieval*, pages 39–43, 2008.
- 628 [12] Glenn Jocher, Jing Qiu, and Ayush Chaurasia. Ultralytics YOLO, version 8.0.0, January 2023.  
629 <https://github.com/ultralytics/ultralytics>.
- 630 [13] Alina Kuznetsova, Hassan Rom, Neil Alldrin, Jasper Uijlings, Ivan Krasin, Jordi Pont-Tuset,  
631 Shahab Kamali, Stefan Popov, Matteo Mallocci, Alexander Kolesnikov, et al. The open images  
632 dataset v4: Unified image classification, object detection, and visual relationship detection at  
633 scale. *International journal of computer vision*, 128(7):1956–1981, 2020.
- 634 [14] Tsung-Yi Lin, Michael Maire, Serge Belongie, James Hays, Pietro Perona, Deva Ramanan, Piotr  
635 Dollár, and C Lawrence Zitnick. Microsoft COCO: Common objects in context. In *Computer*  
636 *vision—ECCV 2014: 13th European conference, zurich, Switzerland, September 6-12, 2014,*  
637 *proceedings, part v 13*, pages 740–755. Springer, 2014.
- 638 [15] Ilya Loshchilov and Frank Hutter. Decoupled weight decay regularization. In *International*  
639 *Conference on Learning Representations*, 2019.
- 640 [16] Sourab Mangrulkar, Sylvain Gugger, Lysandre Debut, Younes Belkada, Sayak Paul, and  
641 Benjamin Bossan. Peft: State-of-the-art parameter-efficient fine-tuning methods. <https://github.com/huggingface/peft>, 2022.
- 643 [17] Thomas Mensink, Jakob Verbeek, Florent Perronnin, and Gabriela Csurka. Distance-based  
644 image classification: Generalizing to new classes at near-zero cost. *IEEE Transactions on*  
645 *Pattern Analysis and Machine Intelligence*, 35(11):2624–2637, 2013.
- 646 [18] Maxime Oquab, Timothée Darcet, Théo Moutakanni, Huy V. Vo, Marc Szafraniec, Vasil  
647 Khalidov, Pierre Fernandez, Daniel Haziza, Francisco Massa, Alaaeldin El-Nouby, Mido  
648 Assran, Nicolas Ballas, Wojciech Galuba, Russell Howes, Po-Yao Huang, Shang-Wen Li, Ishan  
649 Misra, Michael Rabbat, Vasu Sharma, Gabriel Synnaeve, Hu Xu, Herve Jegou, Julien Mairal,  
650 Patrick Labatut, Armand Joulin, and Piotr Bojanowski. DINOv2: Learning robust visual  
651 features without supervision. *Transactions on Machine Learning Research*, 2024. Featured  
652 Certification.
- 653 [19] Tom Pégeot, Eva Feillet, Adrian Popescu, Inna Kucher, and Bertrand Delezoide. Temporal  
654 dynamics in visual data: Analyzing the impact of time on classification accuracy. In *Proceedings*  
655 *of the Winter Conference on Applications of Computer Vision (WACV)*, pages 6932–6943,  
656 February 2025.
- 657 [20] Alec Radford, Jong Wook Kim, Chris Hallacy, Aditya Ramesh, Gabriel Goh, Sandhini Agarwal,  
658 Girish Sastry, Amanda Askell, Pamela Mishkin, Jack Clark, et al. Learning transferable visual  
659 models from natural language supervision. In *International conference on machine learning*,  
660 pages 8748–8763. PMLR, 2021.
- 661 [21] Nikhila Ravi, Valentin Gabeur, Yuan-Ting Hu, Ronghang Hu, Chaitanya Ryali, Tengyu Ma,  
662 Haitham Khedr, Roman Rädle, Chloe Rolland, Laura Gustafson, Eric Mintun, Junting Pan,  
663 Kalyan Vasudev Alwala, Nicolas Carion, Chao-Yuan Wu, Ross Girshick, Piotr Dollár, and  
664 Christoph Feichtenhofer. SAM 2: Segment anything in images and videos. In *The Thirteenth*  
665 *International Conference on Learning Representations*, 2025.
- 666 [22] Leonard Richardson. Beautiful soup documentation. <https://www.crummy.com/software/BeautifulSoup/>.
- 667

- 668 [23] Robin Rombach, Andreas Blattmann, Dominik Lorenz, Patrick Esser, and Björn Ommer. High-  
669 resolution image synthesis with latent diffusion models. In *Proceedings of the IEEE/CVF*  
670 *conference on Computer Vision and Pattern Recognition*, pages 10684–10695, 2022.
- 671 [24] Bart Thomee, David A Shamma, Gerald Friedland, Benjamin Elizalde, Karl Ni, Douglas Poland,  
672 Damian Borth, and Li-Jia Li. Yfcc100m: The new data in multimedia research. *Communications*  
673 *of the ACM*, 59(2):64–73, 2016.
- 674 [25] Hugo Touvron, Matthieu Cord, Matthijs Douze, Francisco Massa, Alexandre Sablayrolles, and  
675 Hervé Jégou. Training data-efficient image transformers & distillation through attention. In  
676 *International conference on machine learning*, pages 10347–10357. PMLR, 2021.
- 677 [26] Frank Wilcoxon. Individual comparisons by ranking methods. In *Breakthroughs in statistics:*  
678 *Methodology and distribution*, pages 196–202. Springer, 1992.
- 679 [27] Bolei Zhou, Agata Lapedriza, Jianxiong Xiao, Antonio Torralba, and Aude Oliva. Learning deep  
680 features for scene recognition using places database. In Z. Ghahramani, M. Welling, C. Cortes,  
681 N. Lawrence, and K.Q. Weinberger, editors, *Advances in Neural Information Processing*  
682 *Systems*, volume 27. Curran Associates, Inc., 2014.
